# Supplementary material for: The fluorescence quenching phenomenon in newly synthesized blue fluorescence protein molecule caused by anchoring group substitution: a DFT and TD-DFT study
Source: Royal Society of Chemistry journal article supplement (doi:10.1039/c6ra26470k), 2017-01-01
Supplement: c6ra26470k1.pdf [file c6ra26470k1.pdf]

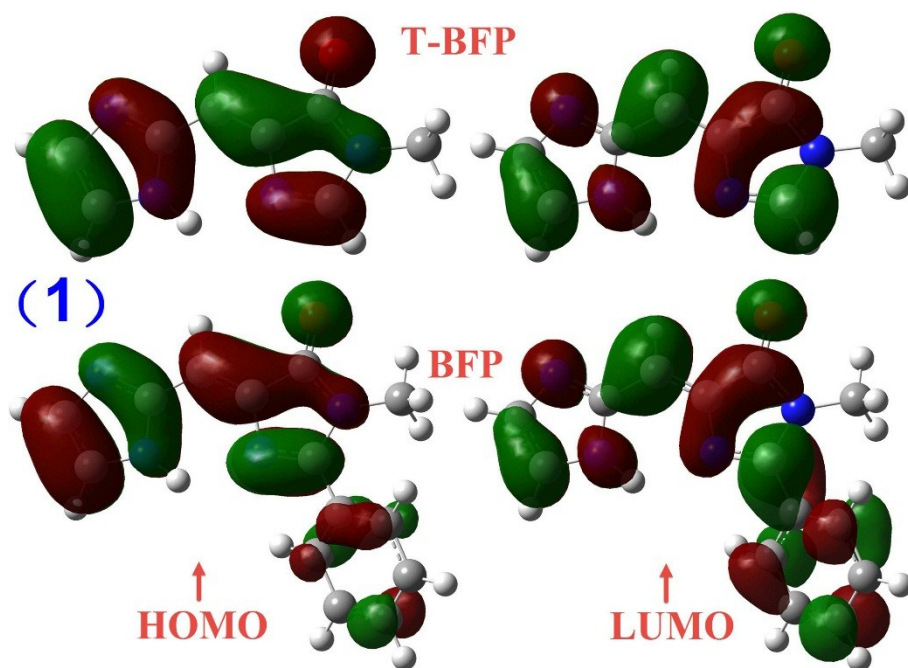

Fig. S1 The HOMO/LUMO orbitals of T-BFP and BFP molecules.

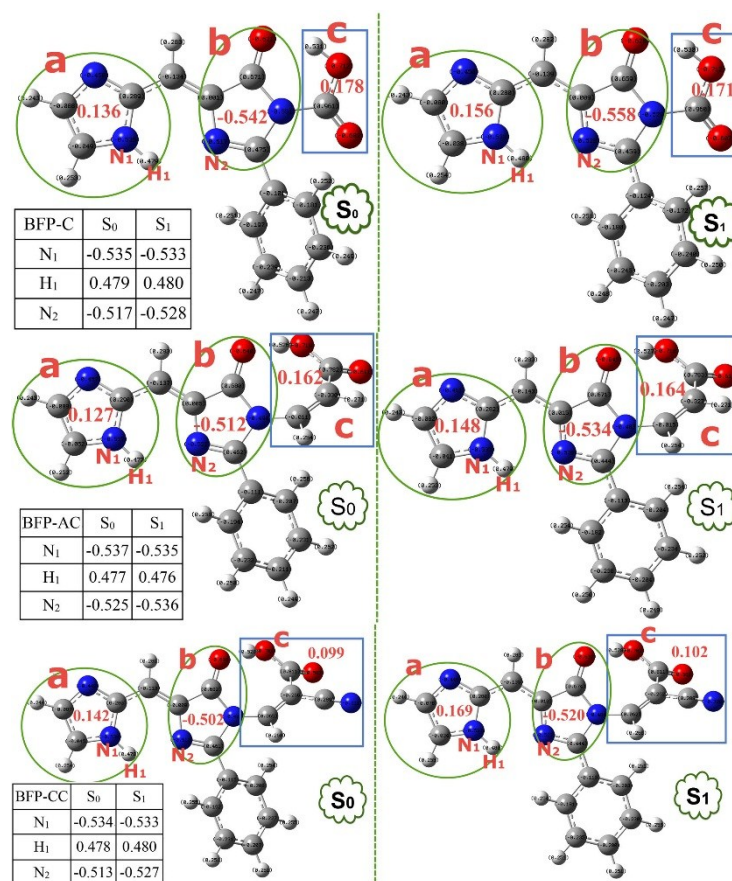

Fig.S2 The NBO charges of BFP-AC, BFP-C and BFP-CC in both S<sub>0</sub> and S<sub>1</sub> states.

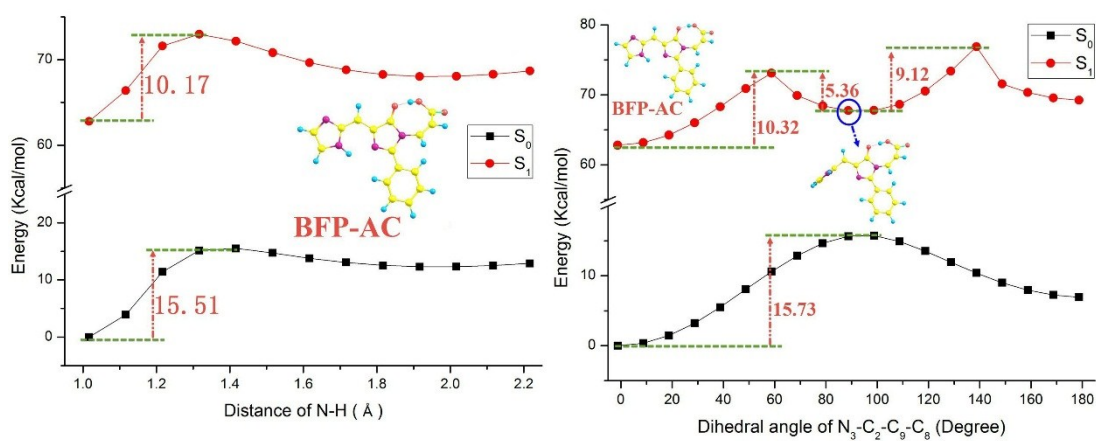

Fig. S3 The potential energy lines of BFP-AC molecule with a series of bonds and angles.

Table S1 The potential energy barriers.

|       |                | BFP   | BFP-C | BFP-AC | BFP-CC | BFP-MC | BFP-MN |
|-------|----------------|-------|-------|--------|--------|--------|--------|
| Bond  | S <sub>0</sub> | 14.62 | 15.38 | 15.51  | 16.09  | 17.02  | 17.28  |
|       | S <sub>1</sub> | 9.08  | 10.69 | 10.17  | 10.38  | 9.69   | 1.17   |
| Angle | S <sub>0</sub> | 14.26 | 15.81 | 15.73  | 16.11  | 14.79  | 14.98  |
|       | S <sub>1</sub> | 12.94 | 7.77  | 10.32  | 8.01   | 23.11  | 23.98  |
